# Supplementary material
Source: ML conference proceedings conference paper supplement (https://proceedings.neurips.cc/paper_files/paper/2020/hash/788d986905533aba051261497ecffcbb-Abstract.html)
Supplement: Supplementary file [file 788d986905533aba051261497ecffcbb-Supplemental.zip]

## Appendix

**HM-ANN Graph Search Algorithm** Algorithm 3 depicts the search algorithm in HM-ANN. The search begins at the entry point in the top layer (Line 1 in Algorithm 3) and then performs a one-greedy search from the layer  $i$  ( $i > 2$ ) to the layer 2 (Lines 4 to 6 in Algorithm 3). To obtain high quality search, HM-ANN performs beam search in L1 and L0 with search budget length  $efSearch_{L1}$  (Line 7 in Algorithm 3) and  $efSearch_{L0}$  (Line 8 in Algorithm 3) respectively. Different from searching in the upper layers, HM-ANN uses multiple entry points in L0. The number of entry points in L0 equals to  $efSearch_{L1}$ .

---

### Algorithm 3: HM-ANN K-NN-Search

---

**Input:** multi-layer graph HM-ANN, query element  $q$ , number of nearest neighbour to return  $K$

**Output:**  $K$  nearest elements to  $q$

**Parameters :** size of the dynamic candidate list in layer 1 and 0 as  $efSearch_{l1}$  and  $efSearch_{l0}$  respectively

```
1  $ep \leftarrow$  entry point of HM-ANN;  
2  $L \leftarrow$  level of  $ep$  ;  
3  $W \leftarrow \emptyset$ ;  
4 for  $i \leftarrow L \dots 2$  do  
5    $W \leftarrow \text{search\_layer}(q, \{ep\}, ef = 1, i)$ ;  
6    $ep \leftarrow$  get nearest element from  $W$  to  $q$ ;  
7  $W \leftarrow \text{search\_layer}(q, \{ep\}, efSearch_{l1}, 1)$ ;  
8  $W \leftarrow \text{search\_layer}(q, W, efSearch_{l0}, 0)$ ;  
9 return  $K$  nearest elements from  $W$  to  $q$ 
```

---
